# Supplementary material for: Effect of a brief dietary counselling intervention on emergency department cardiac chest pain presentations
Source: HighWire-hosted journal article supplement (doi:10.1136/bmjnph-2021-000385), 2022-07-01
Supplement: bmjnph-2021-000385supp005_data_supplement.pdf [file bmjnph-2021-000385supp005_data_supplement.pdf]

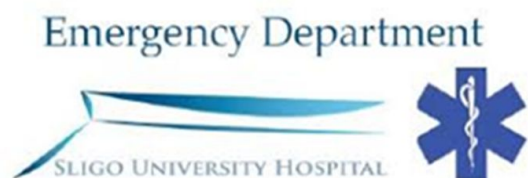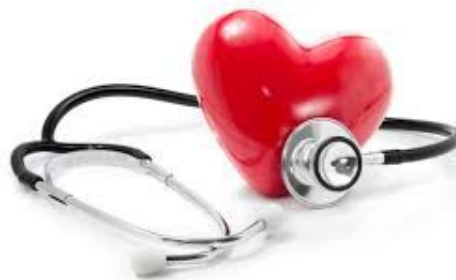

- We focus on foods which have good evidence to show they improve heart health. See the websites below to find out more about healthy eating and living.
- Note: Do not consume any foods to which you have a known allergy.

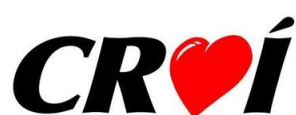

[www.croi.ie](http://www.croi.ie)

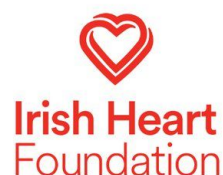

[www.irishheart.ie](http://www.irishheart.ie)

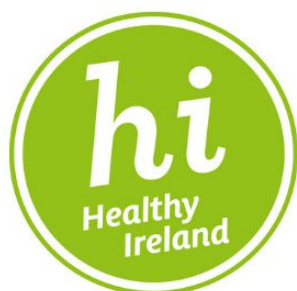

[www.healthyireland.ie](http://www.healthyireland.ie)
